# Supplementary material
Source: PubMed Central journal article supplement (PMC6301273)
Supplement: MD-009-C8MD00448J-s001.pdf [file MD-009-C8MD00448J-s001.pdf]

## Supplementary Information

### Development of selective, fluorescent cannabinoid type 2 receptor ligands based on a 1,8-naphthyridin-2-(1*H*)-one-3-carboxamide scaffold

Anna G. Cooper,<sup>†</sup> Caitlin R. M. Oyagawa,<sup>‡</sup> Jamie J. Manning,<sup>‡</sup> Sameek Singh,<sup>†</sup> Sarah Hook,<sup>†</sup> Natasha L. Grimsey,<sup>‡</sup> Michelle Glass,<sup>‡</sup> Joel D. A. Tyndall,<sup>†</sup> Andrea J. Vernal<sup>†\*</sup>

<sup>†</sup> School of Pharmacy, University of Otago, Dunedin, New Zealand

<sup>‡</sup> Department of Pharmacology and Clinical Pharmacology, and Centre for Brain Research, School of Medical Sciences, University of Auckland, Auckland, New Zealand

\* School of Pharmacy, 18 Frederick Street, Dunedin 9054, New Zealand.

Ph: 64 3 479 4518

Email: [andrea.vernall@otago.ac.nz](mailto:andrea.vernall@otago.ac.nz)

## clogP

cLogP of **2** and SR144528 were calculated in MarvinSketch 17.6 using the ChemAxon Method and electrolyte concentrations of 0.1 mol/dm<sup>3</sup> of Cl<sup>-</sup> and Na<sup>+</sup> K<sup>+</sup>.

## Synthesis of all other compounds not reported within manuscript

### 6-Bromo-*N*-(4-methylcyclohexyl)-1-[2-(morpholin-4-yl)ethyl]-2-oxo-1,2-dihydro-1,8-naphthyridine-3-carboxamide (**1**)

To a stirred solution of **5** (22 mg, 59.9 μmol) in DMF (1 mL) was added caesium carbonate (55 mg, 0.17 mmol). After stirring for 1 h, 4-(2-chloroethyl)morpholine hydrochloride (22 mg, 0.12 mmol) was added. The mixture was stirred at 50 °C for 12 h and upon cooling was evaporated under reduced pressure. Saturated aq. NaHCO<sub>3</sub> was added until pH 10-11 and then extracted with DCM (3 x 20 mL). The combined organics were washed with H<sub>2</sub>O (1 x 60 mL), dried over MgSO<sub>4</sub> and evaporated under reduced pressure. The crude product was purified by crystallisation in ACN to yield **1** (10.5 mg, 22.0 μmol, 37%), as a yellow solid. <sup>1</sup>H NMR (400 MHz, CDCl<sub>3</sub>) δ 9.80 (m, 1H, NH isomer A), 9.41 (m, 1H, NH isomer B) 8.80 (s, 1H, ArH), 8.69 (d, *J* = 2.3 Hz, 1H, ArH), 8.19 (t, *J* = 2.1 Hz, 1H, ArH), 5.04 – 4.58 (m, 2H, N1-CH<sub>2</sub>), 4.32 – 3.91 (m, 1H, NHCH isomer A and NHCH isomer B), 3.92 – 3.55 (m, 4H, N-CH<sub>2</sub> morpholino), 3.40 – 2.22 (m, 6H, N1-CH<sub>2</sub>CH<sub>2</sub> & O-CH<sub>2</sub> morpholino), 2.12 – 0.88 (m, 12H, CH & CH<sub>2</sub> cyclohexyl, CH<sub>3</sub>). Isomers A and B represent cis/trans (in no defined order) isomers. Data matches the literature reference.<sup>1</sup> <sup>13</sup>C NMR (101 MHz, CDCl<sub>3</sub>) δ 162.50, 162.36, 161.26, 152.67, 152.61, 148.21, 141.02, 140.10, 124.54, 116.46, 55.51, 53.40, 49.06, 45.76, 33.99, 33.07, 32.11, 31.24, 30.25, 29.84, 29.74, 22.36, 21.80. Isomers A and B resolved as separate peaks in some instances, but are not assigned. HRMS-ESI calculated for C<sub>22</sub>H<sub>30</sub>BrN<sub>4</sub>O<sub>3</sub> [M+H]<sup>+</sup> 477.1496, found *m/z* 477.1462. Analytical RP-HPLC R<sub>t</sub> = 15.57 min (57%) and 15.84 min (43%).

### Methyl 5-{6-bromo-3-[(4-methylcyclohexyl)carbamoyl]-2-oxo-1,2-dihydro-1,8-naphthyridin-1-yl}pentanoate (**6**)

To a stirred solution of **5**<sup>1</sup> (319 mg, 0.88 mmol) in DMF (4 mL), was added caesium carbonate (799 mg, 2.5 mmol). After stirring for 1 h, methyl 5-bromovalerate (0.25 mL, 1.8 mmol) was added. The mixture was stirred at 50 °C for 12 h and upon cooling was evaporated under reduced pressure. The solid was taken up in ACN and filtered. The filtrate was evaporated and then purified by recrystallisation in ACN to yield **6** (94 mg, 0.20 mmol,

22%), as a white solid.  $^1\text{H}$  NMR (400 MHz,  $\text{CDCl}_3$ )  $\delta$  9.93 (d,  $J = 7.8$  Hz, 1H, NH isomer A), 9.55 (d,  $J = 8.1$  Hz, 1H, NH isomer B), 8.79 (s, 1H, ArH), 8.70 (d,  $J = 2.4$  Hz, 1H, ArH), 8.17 (dd,  $J = 3.5, 2.4$  Hz, 1H, ArH), 4.65 – 4.46 (m, 2H, N-CH<sub>2</sub>), 4.25 (m, 1H, NHCH isomer A), 3.9 (m, 1H, NHCH isomer B), 3.67 (s, 3H, O-CH<sub>3</sub>), 2.47 – 2.34 (m, 2H, CH<sub>2</sub>COOMe), 2.11 – 0.87 (m, 16H, N-CH<sub>2</sub>(CH<sub>2</sub>)<sub>2</sub>, CH & CH<sub>2</sub> cyclohexyl & CH<sub>3</sub>). Isomers A and B represent cis/trans (in no defined order) isomers.  $^{13}\text{C}$  NMR (101 MHz,  $\text{CDCl}_3$ )  $\delta$  173.92, 173.87, 162.34, 162.29, 161.55, 161.53, 152.77, 152.72, 148.34, 148.28, 140.76, 140.58, 139.83, 139.79, 124.47, 124.38, 116.25, 116.24, 114.27, 114.21, 51.71, 51.70, 49.03, 45.83, 41.80, 41.72, 34.01, 33.83, 33.82, 33.07, 32.12, 31.21, 30.30, 29.72, 27.48, 27.47, 22.47, 22.45, 22.36, 21.67. Isomers A and B resolved as separate peaks in some instances, but are not assigned. HRMS-ESI calculated for  $\text{C}_{22}\text{H}_{28}\text{BrN}_3\text{NaO}_4$   $[\text{M}+\text{Na}]^+$  500.1155, found  $m/z$  500.1117. Analytical RP-HPLC  $R_t = 23.16$  min (50%) and 24.15 min (50%).

**Methyl 4-({6-bromo-3-[(4-methylcyclohexyl)carbamoyl]-2-oxo-1,2-dihydro-1,8-naphthyridin-1-yl}methyl)benzoate (7)**

A solution of **5** (75 mg, 0.23 mmol), caesium carbonate (206 mg, 0.63 mmol) and methyl 4-bromomethylbenzoate (104 mg, 0.45 mmol) in DMF (1.1 mL) was reacted as described in the procedure for **6**. The crude residue was purified by flash silica gel column chromatography (99:1 DCM/MeOH) and a portion (6 mg) of the solid obtained (20 mg) was further purified by semi-preparative RP-HPLC to yield **7** (3.54 mg, 6.93  $\mu\text{mol}$ ), as a white solid.  $^1\text{H}$  NMR (400 MHz,  $\text{CDCl}_3$ )  $\delta$  9.92 – 9.75 (m, 1H, NH isomer A), 9.49 – 9.38 (m, 1H, NH isomer B), 8.84 (s, 1H, ArH), 8.73 – 8.65 (m, 1H, ArH), 8.22 – 8.16 (m, 1H, ArH), 8.00 – 7.89 (m, 2H, ArH Ph), 7.48 – 7.38 (m, 2H, ArH Ph), 5.81 (d,  $J = 8.6$  Hz, 2H, N1-CH<sub>2</sub>), 4.37 – 4.16 (m, 1H, NHCH), 2.11 – 0.89 (m, 15H, CH & CH<sub>2</sub> cyclohexyl, CH<sub>3</sub>). Isomers A and B represent cis/trans (in no defined order) isomers. HRMS-ESI calculated for  $\text{C}_{25}\text{H}_{26}\text{BrN}_3\text{NaO}_4$   $[\text{M}+\text{Na}]^+$  534.0999, found  $m/z$  534.1008. Analytical RP-HPLC  $R_t = 24.16$  min (50%) and 24.44 min (50%).

**Methyl 5-[6-(4-methoxyphenyl)-3-[(4-methylcyclohexyl)carbamoyl]-2-oxo-1,2-dihydro-1,8-naphthyridin-1-yl]pentanoate (8)**

Compound **6** (16 mg, 32.8  $\mu\text{mol}$ ), 4-methoxyphenylboronic acid (6.5 mg, 42.7  $\mu\text{mol}$ ) and  $\text{Na}_2\text{CO}_3$  (9.1 mg, 85.4  $\mu\text{mol}$ ) were dissolved in a 1:4 v:v mixture of  $\text{H}_2\text{O}$  and DMF (1.5 mL).  $\text{Pd}(\text{OAc})_2$  (0.08 mg, 0.33  $\mu\text{mol}$ ) was added and the reaction mixture heated to 110 °C and

stirred for 3 h, then cooled to rt and diluted with H<sub>2</sub>O (1.5 mL). The aqueous phase was extracted with EA (4 x 1.5 mL) and the combined organics washed with H<sub>2</sub>O (3 x 6 mL) and sat. aq. NaCl (1 x 6 mL), dried over MgSO<sub>4</sub> and evaporated under reduced pressure. The crude product was purified by flash silica gel column chromatography (2:1 hexane/EA) to yield the desired **8** (9.2 mg, 18.1 μmol, 55%), as a yellow solid (*R*<sub>f</sub> 0.5, 1:1 hexane/EA). <sup>1</sup>H NMR (400 MHz, CDCl<sub>3</sub>) δ 10.04 (d, *J* = 7.8 Hz, 1H, NH isomer A), 9.67 (d, *J* = 8.0 Hz, 1H, NH, isomer B), 8.91 (s, 1H, ArH), 8.89 (d, *J* = 2.4 Hz, 1H, ArH), 8.19 – 8.12 (m, 1H, ArH), 7.63 – 7.50 (m, 2H, ArH MeOPh), 7.11 – 6.99 (m, 2H, ArH MeOPh), 4.73 – 4.54 (m, 2H, N-CH<sub>2</sub>), 4.26 (m, 1H, NHCH isomer A), 3.93 (m, 1H, NHCH isomer B), 3.88 (s, 3H, PhO-CH<sub>3</sub>), 3.67 (s, 3H, COOCH<sub>3</sub>), 2.52 – 2.40 (m, 2H, CH<sub>2</sub>COOMe), 2.36 (m, 1H, CHCH<sub>3</sub> isomer A), 2.09 (m, 1H, CHCH<sub>3</sub> isomer B), 1.90 – 0.87 (m, 15H, N-CH<sub>2</sub>(CH<sub>2</sub>)<sub>2</sub>, CH<sub>2</sub> cyclohexyl, CH<sub>3</sub>). Isomers A and B represent cis/trans (in no defined order) isomers. <sup>13</sup>C NMR (101 MHz, CDCl<sub>3</sub>) δ 174.04, 173.99, 162.56, 162.52, 162.10, 160.07, 160.06, 150.63, 150.58, 148.57, 148.51, 142.07, 141.89, 135.46, 135.43, 132.28, 132.22, 128.96, 128.92, 128.27, 123.56, 123.47, 114.93, 114.83, 55.58, 51.73, 51.70, 48.94, 45.80, 41.66, 41.57, 34.21, 34.05, 33.93, 33.91, 33.61, 33.11, 32.14, 31.20, 30.34, 29.75, 28.21, 27.61, 22.56, 22.53, 22.39, 21.65, 21.36. Isomers A and B resolved as separate peaks in some instances, but are not assigned. HRMS-ESI calculated for C<sub>29</sub>H<sub>35</sub>N<sub>3</sub>NaO<sub>5</sub> [M+Na]<sup>+</sup> 528.2469, found *m/z* 528.2475. Analytical RP-HPLC *R*<sub>t</sub> = 24.33 min (50%) and 25.08 min (50%).

### **5-{6-Bromo-3-[(4-methylcyclohexyl)carbamoyl]-2-oxo-1,2-dihydro-1,8-naphthyridin-1-yl}pentanoic acid (**9**)**

A solution of **6** (60 mg, 0.13 mmol) and 10% NaOH (10 mL) was heated to 110 °C for 5 h. The mixture was cooled and conc. HCl added until pH 2-3. The precipitate was filtered and treated with diethyl ether to yield **9** (25 mg, 54.5 μmol, 43%) as a white solid (*R*<sub>f</sub> 0.34, 1:1 hexane/EA). <sup>1</sup>H NMR (400 MHz, CDCl<sub>3</sub>) δ 9.95 (d, *J* = 7.7 Hz, 1H, NH isomer A), 9.57 (d, *J* = 7.9 Hz, 1H, NH isomer B), 8.81 (s, 1H, ArH), 8.70 (d, *J* = 2.1 Hz, 1H, ArH), 8.18 (t, *J* = 2.7 Hz, 1H, ArH), 4.64 – 4.46 (m, 2H, N-CH<sub>2</sub>), 4.25 (m, 1H, NHCH isomer A), 3.89 (m, 1H, NHCH isomer B), 2.56 – 2.35 (m, 2H, CH<sub>2</sub>COOH), 2.15 – 0.87 (m, 16H, N-CH<sub>2</sub>(CH<sub>2</sub>)<sub>2</sub>, CH & CH<sub>2</sub> cyclohexyl & CH<sub>3</sub>). Isomers A and B represent cis/trans (in no defined order) isomers. <sup>13</sup>C NMR (101 MHz, CDCl<sub>3</sub>) δ 178.34, 178.28, 162.35, 162.30, 161.70, 161.69, 152.84, 152.80, 148.31, 148.26, 140.98, 140.81, 139.92, 139.88, 124.30, 124.21, 116.26, 116.25, 114.34, 114.28, 49.11, 45.91, 41.75, 41.67, 33.99, 33.65, 33.64, 33.04, 32.10, 31.20, 30.28, 29.84, 29.71, 27.40, 22.36, 22.21, 22.19, 21.68. Isomers A and B resolved as separate

peaks in some instances, but are not assigned. HRMS-ESI calculated for  $C_{21}H_{26}BrN_3NaO_4$   $[M+Na]^+$  486.0999, found  $m/z$  486.1007.

***tert*-Butyl *N*-[8-(5-{6-bromo-3-[(4-methylcyclohexyl)carbamoyl]-2-oxo-1,2-dihydro-1,8-naphthyridin-1-yl}pentanamido)octyl]carbamate (**10**)**

To a solution of **9** (13 mg, 27.8  $\mu$ mol) in anhydrous DMF (2 mL) were added DIPEA (14.5  $\mu$ L, 85  $\mu$ mol) and HATU (11 mg, 27.8  $\mu$ mol). After stirring for 5 min, a solution of *tert*-butyl-*N*-(8-aminooctyl)carbamate (prepared according to a literature procedure)<sup>2</sup> (22 mg, 88.8  $\mu$ mol) and DIPEA (14.5  $\mu$ L, 85  $\mu$ mol) in DMF (1.5 mL) was added. The reaction mixture was stirred for 14 h and then the solvent evaporated under reduced pressure. The crude residue was purified by flash silica gel column chromatography (1:1 hexane/EA) to yield **10** (14 mg, 19.6  $\mu$ mol, 71%) as a grey solid ( $R_f$  0.484 1:2 hexane/EA). <sup>1</sup>H NMR (400 MHz, MeOD-*d*<sub>4</sub>)  $\delta$  10.33 (d,  $J$  = 7.9 Hz, 1H, NH isomer A), 9.89 (d,  $J$  = 7.9 Hz, 1H, NH isomer B), 8.83 – 8.75 (m, 2H, ArH), 8.52 (dd,  $J$  = 4.2, 2.4 Hz, 1H, ArH), 4.65 – 4.51 (m, 2H, N1-CH<sub>2</sub>), 4.21 (m, 1H, NHCH isomer A), 3.81 (m, 1H, NHCH isomer B), 3.14 (t,  $J$  = 7.0 Hz, 2H, CH<sub>2</sub>), 3.04 – 2.86 (m, 2H, CH<sub>2</sub>), 2.32 – 2.20 (m, 2H, CH<sub>2</sub>), 2.10 – 0.90 (m, 37H, CH, CH<sub>2</sub>, CH<sub>3</sub>). Isomers A and B represent cis/trans (in no defined order) isomers. <sup>13</sup>C NMR (101 MHz, MeOD-*d*<sub>4</sub>)  $\delta$  175.66, 163.62, 163.41, 154.11, 149.57, 142.26, 141.71, 124.66, 117.54, 117.51, 115.28, 115.24, 79.74, 50.33, 49.64, 49.43, 49.21, 49.00, 48.79, 48.57, 48.36, 46.69, 42.76, 42.66, 41.35, 40.76, 40.34, 40.23, 36.71, 36.67, 34.96, 33.82, 33.16, 32.69, 31.08, 30.95, 30.74, 30.35, 30.32, 30.09, 30.02, 28.80, 28.53, 28.39, 28.36, 27.91, 27.81, 27.77, 27.34, 24.43, 24.40, 22.56. Isomers A and B resolved as separate peaks in some instances, but are not assigned. HRMS-ESI calculated for  $C_{34}H_{52}BrN_5NaO_5$   $[M+Na]^+$  712.3044, found  $m/z$  712.3065.

***tert*-Butyl *N*-(2-{2-[2-(5-{6-bromo-3-[(4-methylcyclohexyl)carbamoyl]-2-oxo-1,2-dihydro-1,8-naphthyridin-1-yl}pentanamido)ethoxy]ethoxy}ethyl)carbamate (**11**)**

Compound **9** (8.9 mg, 19.2  $\mu$ mol), DIPEA (20.1  $\mu$ L, 0.12 mmol), HATU (7.3 mg, 19.2  $\mu$ mol) and *tert*-butyl *N*-{2-[2-(2-aminoethoxy)ethoxy]-ethyl}carbamate (prepared according to literature procedure)<sup>3</sup> (15 mg, 62.0  $\mu$ mol) in DMF (1.8 mL) were used as described in the procedure for **10**. The crude product was purified by flash silica gel column chromatography (1:7 hexane/EA) to yield **11** (10 mg, 14.7  $\mu$ mol, 77%) as a grey solid ( $R_f$  0.19 1:2 hexane/EA). <sup>1</sup>H NMR (400 MHz, CDCl<sub>3</sub>)  $\delta$  9.95 (d,  $J$  = 7.7 Hz, 1H, NH isomer A), 9.57 (d,  $J$

= 8.0 Hz, 1H, NH isomer B), 8.76 (s, 1H, ArH), 8.69 (d,  $J = 2.1$  Hz, 1H, ArH), 8.20 – 8.12 (m, 1H, ArH), 6.16 (s, 1H, NH), 4.98 (s, 1H, NH), 4.62 – 4.43 (m, 2H, N1-CH<sub>2</sub>), 4.22 (m, 1H, NHCH isomer A), 3.87 (m, 1H, NHCH isomer B), 3.74 – 3.38 (m, 10H, CH<sub>2</sub>), 3.36 – 3.20 (br m, 2H, CH<sub>2</sub>), 2.36 – 2.21 (br m, 2H, CH<sub>2</sub>), 2.10 – 0.85 (m, 25H, CH, CH<sub>2</sub>, CH<sub>3</sub>). Isomers A and B represent cis/trans (in no defined order) isomers. <sup>13</sup>C NMR (101 MHz, CDCl<sub>3</sub>)  $\delta$  162.31, 162.27, 161.65, 152.89, 152.86, 148.27, 140.83, 140.66, 139.86, 139.82, 124.33, 124.24, 116.24, 114.31, 114.25, 70.47, 70.36, 70.25, 70.10, 49.07, 45.88, 41.87, 39.60, 36.14, 33.99, 33.07, 32.11, 30.29, 29.71, 28.55, 27.53, 23.33, 22.36, 21.69. Isomers A and B resolved as separate peaks in some instances, but are not assigned. HRMS-ESI calculated for C<sub>32</sub>H<sub>49</sub>BrN<sub>5</sub>O<sub>7</sub> [M+H]<sup>+</sup> 694.2810, found  $m/z$  694.2870.

**1-{4-[(8-Aminooctyl)carbamoyl]butyl}-6-bromo-*N*-(4-methylcyclohexyl)-2-oxo-1,2-dihydro-1,8-naphthyridine-3-carboxamide (12)**

Compound **10** (11 mg, 16.1  $\mu$ mol) was dissolved in DCM (0.9 mL) and TFA (0.9 mL) was added. After 1 h stirring, the reaction mixture was evaporated under N<sub>2</sub> stream, followed by reduced pressure. The crude was purified by semi-preparative RP-HPLC to yield the TFA salt of **12** (11.9 mg, 14.6  $\mu$ mol, 91%) as a white solid. HRMS-ESI calculated for C<sub>29</sub>H<sub>45</sub>BrN<sub>5</sub>O<sub>3</sub> [M+H]<sup>+</sup> 590.2700, found  $m/z$  590.2703. Analytical RP-HPLC  $R_t$  = 18.12 min (40%) and 18.27 min (60%).

**1-[4-({2-[2-(2-Aminoethoxy)ethoxy]ethyl}carbamoyl)butyl]-6-bromo-*N*-(4-methylcyclohexyl)-2-oxo-1,2-dihydro-1,8-naphthyridine-3-carboxamide (13)**

A solution of **11** (8.0 mg, 11.5  $\mu$ mol) and TFA (1.2 mL) in DCM (1.2 mL) was reacted as described in the procedure for **12**. The crude was purified by semi-preparative RP-HPLC to yield the TFA salt of **13** (8.1 mg, 9.8  $\mu$ mol, 86%) as a white solid. HRMS-ESI calculated for C<sub>27</sub>H<sub>41</sub>BrN<sub>5</sub>O<sub>5</sub> [M+H]<sup>+</sup> 594.2286, found  $m/z$  594.2294. Analytical RP-HPLC  $R_t$  = 16.84 min (51%) and 17.01 min (49%).

**6-Bromo-1-{4-[(8-acetamidooctyl)carbamoyl]butyl}-*N*-(4-methylcyclohexyl)-2-oxo-1,2-dihydro-1,8-naphthyridine-3-carboxamide (14)**

To a solution of the TFA salt of **12** (2.4 mg, 2.9  $\mu$ mol) and DIPEA (1.9  $\mu$ L, 10.9  $\mu$ mol, added as a 1:10 solution in DCM) in DCM (500  $\mu$ L) was added acetic anhydride (0.28  $\mu$ L, 3.0  $\mu$ mol, added as a 1:10 solution in DCM) and the mixture stirred at rt for 1 h. The reaction

solvent was evaporated under N<sub>2</sub> stream. The product was purified by semi-preparative RP-HPLC and passed through an Amberlyst A21 ion exchange resin to remove TFA, yielding **14** (1.76 mg, 2.8 μmol, 95%) as a white solid. HRMS-ESI calculated for C<sub>31</sub>H<sub>46</sub>BrN<sub>5</sub>NaO<sub>4</sub> [M+Na]<sup>+</sup> 654.2625, found *m/z* 654.2612. Analytical RP-HPLC R<sub>t</sub> = 21.04 min (40%) and 21.20 min (60%).

**6-Bromo-1-[4-({2-[2-(2-acetamidoethoxy)ethoxy]ethyl}carbamoyl)butyl]-N-(4-methylcyclohexyl)-2-oxo-1,2-dihydro-1,8-naphthyridine-3-carboxamide (15)**

The TFA salt of **13** (1.53 mg, 1.9 μmol), DIPEA (1.2 μL, 6.9 μmol), and acetic anhydride (0.18 μL, 1.9 μmol) in DCM (437 μL) were treated as in the procedure for **14**. The product was purified by semi-preparative RP-HPLC and passed through an Amberlyst A21 ion exchange resin to remove TFA, yielding **15** (1.14 mg, 1.8 μmol, 96%) as a white solid. HRMS-ESI calculated for C<sub>29</sub>H<sub>42</sub>BrN<sub>5</sub>NaO<sub>6</sub> [M+Na]<sup>+</sup> 658.2211, found *m/z* 658.2191. Analytical RP-HPLC R<sub>t</sub> = 18.90 min (53%) and 19.11 min (47%).

**6-Bromo-1-[4-({8-[6-(2-{4-[(*E*)-2-[2,2-difluoro-4-(thiophen-2-yl)-1λ4,3-diaza-2λ4-boratricyclo[7.3.0.0<sup>3,7</sup>]dodeca-1(12),4,6,8,10-pentaen-12-yl]ethenyl]phenoxy}acetamido)hexanamido]octyl}carbamoyl)butyl]-N-(4-methylcyclohexyl)-2-oxo-1,2-dihydro-1,8-naphthyridine-3-carboxamide (16)**

To a solution of the TFA salt of **12** (4.9 mg, 6.0 μmol) in anhydrous DMF (500 μL), was added a solution of DIPEA (2.6 μL, 14.9 μmol) in anhydrous DMF (41.6 μL), followed by a solution of BODIPY 630/650-X-OSu (1.25 mg, 1.89 μmol) in anhydrous DMF (300 μL). The mixture was swirled, left standing for 12 h, then evaporated under reduced pressure. The crude product was purified by semi-preparative RP-HPLC and passed through an Amberlyst A21 ion exchange resin to remove TFA, yielding **16** (1.98 mg, 1.7 μmol, 92%) as a bright blue solid. HRMS-ESI calculated for C<sub>58</sub>H<sub>70</sub>BBBrF<sub>2</sub>N<sub>8</sub>NaO<sub>6</sub>S [M+Na]<sup>+</sup> 1157.4285, found *m/z* 1157.4175. Analytical RP-HPLC R<sub>t</sub> = 25.44 min (cis trans isomers resolved as one peak in standard analytical method).

**6-Bromo-1-(4-{[2-(2-{[6-(2-{4-[(*E*)-2-[2,2-difluoro-4-(thiophen-2-yl)-1λ4,3-diaza-2λ4-boratricyclo[7.3.0.0<sup>3,7</sup>]dodeca-1(12),4,6,8,10-pentaen-12-yl]ethenyl]phenoxy}acetamido)hexanamido]ethoxy}ethoxy)ethyl]carbamoyl}butyl)-*N*-(4-methylcyclohexyl)-2-oxo-1,2-dihydro-1,8-naphthyridine-3-carboxamide (17)**

The TFA salt of **13** (5.32 mg, 6.5 μmol), DIPEA (2.8 μL, 15.9 μmol), BODIPY 630/650-X-OSu (1.25 mg, 1.89 μmol) and DMF (844 μL) were reacted as described in the procedure for **16**. The crude product was purified by semi-preparative RP-HPLC and passed through an Amberlyst A21 ion exchange resin to remove TFA, yielding **17** (1.9 mg, 1.7 μmol, 88%) as a bright blue solid. HRMS-ESI calculated for C<sub>56</sub>H<sub>66</sub>BBBrF<sub>2</sub>N<sub>8</sub>NaO<sub>8</sub>S [M+Na]<sup>+</sup> 1161.3870, found *m/z* 1161.3780. Analytical RP-HPLC R<sub>t</sub> = 24.39 min (55%) and 24.50 min (45%).

Compounds **19**, **20** detailed in manuscript.

***trans*-*N*-(4-Hydroxycyclohexyl)-6-(4-methoxyphenyl)-1-[2-(morpholin-4-yl)ethyl]-2-oxo-1,2-dihydro-1,8-naphthyridine-3-carboxamide (21)**

To a stirred solution of **19** (800 mg, 2.0 mmol) in anhydrous DMF (40 mL) was added DIPEA (2 mL, 11.8 mmol) and HATU (743 mg, 2.0 mmol). The reaction mixture was stirred for 5 min, then *trans*-4-aminocyclohexanol hydrochloride (675 mg, 5.9 mmol) in DMF (40 mL) was added and the mixture stirred for 42 h. The DMF was evaporated under reduced pressure and the residue taken up in H<sub>2</sub>O (50 mL) and extracted with DCM (3 x 50 mL). The combined organics were washed with H<sub>2</sub>O (2 x 60 mL), dried over MgSO<sub>4</sub>, filtered and evaporated under reduced pressure. The crude was purified by precipitation in ACN, yielding **21** (815 mg, 1.6 mmol, 82%) as a yellow solid. <sup>1</sup>H NMR (400 MHz, CDCl<sub>3</sub>) δ 9.72 (d, *J* = 7.9 Hz, 1H, NH), 8.91 (s, 1H, ArH), 8.89 (d, *J* = 2.4 Hz, 1H, ArH), 8.17 (d, *J* = 2.4 Hz, 1H, ArH), 7.60 – 7.51 (m, 2H, ArH MeOPh), 7.10 – 7.00 (m, 2H, ArH MeOPh), 4.83 – 4.71 (m, 2H, N-CH<sub>2</sub>), 4.07 – 3.93 (m, 1H, CH), 3.87 (s, 3H, O-CH<sub>3</sub>), 3.75 – 3.64 (m, 5H, CH & O-CH<sub>2</sub> morpholino), 2.78 – 2.69 (m, 2H, N-CH<sub>2</sub>), 2.68 – 2.57 (m, 4H, N-CH<sub>2</sub> morpholino), 2.18 – 2.09 (m, 2H, CH<sub>2</sub>), 2.09 – 1.99 (m, 2H, CH<sub>2</sub>), 1.54 – 1.36 (m, 4H, CH<sub>2</sub>). <sup>13</sup>C NMR (101 MHz, CDCl<sub>3</sub>) δ 162.57, 162.30, 160.11, 150.64, 148.65, 142.24, 135.44, 132.36, 128.85, 128.26, 123.24, 114.95, 114.78, 69.93, 67.15, 56.04, 55.58, 54.05, 47.94, 39.13, 34.04, 30.67. HRMS-ESI calculated for C<sub>28</sub>H<sub>35</sub>N<sub>4</sub>O<sub>5</sub> [M+H]<sup>+</sup> 507.2602, found *m/z* 507.2571. Analytical RP-HPLC R<sub>t</sub> = 13.85 min.

***tert*-Butyl *N*-[(1*s*,4*s*)-4-[6-(4-methoxyphenyl)-1-[2-(morpholin-4-yl)ethyl]-2-oxo-1,2-dihydro-1,8-naphthyridine-3-amido]cyclohexyl]carbamate (**22**)**

Compound **19** (experimental detailed in manuscript) (50 mg, 0.12 mmol), DIPEA (128  $\mu$ L, 0.73 mmol), HATU (46 mg, 0.12 mmol) and 1-*N*-Boc-*cis*-1,4-cyclohexyldiamine (79 mg, 0.37 mmol) in DMF (2.5 mL) were used as described in the procedure for **10**. The reaction mixture was evaporated under reduced pressure and the residue taken up in EA (5 mL), washed with H<sub>2</sub>O (3 x 5 mL), dried over MgSO<sub>4</sub>, filtered and evaporated under reduced pressure. The crude product was purified by flash silica gel column chromatography (4:1 EA/hexane) to yield **22** (53 mg, 87.2  $\mu$ mol, 71%) as a yellow solid (*R*<sub>f</sub> 0.34, 100% EA). <sup>1</sup>H NMR (400 MHz, CDCl<sub>3</sub>)  $\delta$  10.00 (d, *J* = 7.8 Hz, 1H, NH), 9.01 – 8.81 (m, 2H, ArH), 8.25 – 8.11 (m, 1H, ArH), 7.62 – 7.44 (m, 2H, ArH MeOPh), 7.09 – 6.95 (m, 2H, ArH MeOPh), 4.77 (t, *J* = 7.2 Hz, 2H, N1-CH<sub>2</sub>), 4.72 – 4.59 (m, 1H, NH), 4.28 – 4.14 (m, 1H, CH), 3.86 (s, 3H, O-CH<sub>3</sub>), 3.68 (t, *J* = 4.5 Hz, 5H, CH, N-CH<sub>2</sub> morpholino), 2.74 (t, *J* = 7.2 Hz, 2H, N1-CH<sub>2</sub>CH<sub>2</sub>), 2.64 (t, *J* = 4.4 Hz, 4H, O-CH<sub>2</sub> morpholino), 1.82 (d, *J* = 14.6 Hz, 6H, CH<sub>2</sub>), 1.68 – 1.54 (m, 2H, CH<sub>2</sub>), 1.45 (d, *J* = 1.4 Hz, 9H, *t*Bu CH<sub>3</sub>). <sup>13</sup>C NMR (101 MHz, CDCl<sub>3</sub>)  $\delta$  162.61, 162.11, 160.09, 155.28, 150.60, 148.63, 142.13, 135.39, 132.33, 128.81, 128.23, 123.26, 114.93, 114.76, 79.33, 67.12, 56.00, 55.55, 54.02, 47.41, 45.60, 39.09, 28.91, 28.64, 28.57. HRMS calculated for C<sub>33</sub>H<sub>44</sub>N<sub>5</sub>O<sub>6</sub> [M+H]<sup>+</sup> 606.3286, found *m/z* 606.3246.

Compound **23** detailed in manuscript.

***trans*-4-[6-(4-Methoxyphenyl)-1-[2-(morpholin-4-yl)ethyl]-2-oxo-1,2-dihydro-1,8-naphthyridine-3-amido]cyclohexyl 2-[(*tert*-butoxy)carbonyl]amino}acetate (**24**)**

A stirred solution of Boc-glycine (10 mg, 59  $\mu$ mol) and TFFH (16 mg, 59  $\mu$ mol) in anhydrous DCM (1.6 mL) was cooled to 0 °C and Et<sub>3</sub>N (41  $\mu$ L, 0.30 mmol) was added. The mixture was warmed to rt and stirred for 30 min and then **21** (30 mg, 59  $\mu$ mol) and DMAP (0.7 mg, 5.9  $\mu$ mol) were added. The mixture was stirred for 14 h at rt and then evaporated under reduced pressure. The residue was taken up in EA (3 mL) and washed with H<sub>2</sub>O (3 x 3 mL) and sat. aq. NaCl (1 x 3 mL), dried over MgSO<sub>4</sub>, filtered and evaporated under reduced pressure. The crude residue was purified by flash silica column chromatography (100% EA) to yield **24** (8.5 mg, 12.8  $\mu$ mol, 22%) as a yellow solid. <sup>1</sup>H NMR (400 MHz, CDCl<sub>3</sub>)  $\delta$  9.71 (d, *J* = 7.9 Hz, 1H, NH), 8.97 – 8.86 (m, 2H, ArH), 8.17 (d, *J* = 2.4, 1H, ArH), 7.61 – 7.52 (m, 2H, ArH MeOPh), 7.11 – 7.00 (m, 2H, ArH MeOPh), 5.05 – 4.98 (m, 1H, NH), 4.78 (t, *J*

= 7.1 Hz, 2H, N1-CH<sub>2</sub>), 4.51 – 4.33 (m, 1H, CH), 4.07 – 3.91 (m, 2H, CH<sub>2</sub>), 3.87 (s, 3H, O-CH<sub>3</sub>), 3.74 – 3.64 (m, 5H, CH, N-CH<sub>2</sub> morpholino), 2.76 (t, *J* = 7.2 Hz, 2H, N1-CH<sub>2</sub>CH<sub>2</sub>), 2.66 (t, *J* = 4.5 Hz, 4H, O-CH<sub>2</sub> morpholino), 2.19 – 1.99 (m, 4H, CH<sub>2</sub>), 1.70 – 1.06 (m, 13H, CH<sub>2</sub>, *t*Bu CH<sub>3</sub>). <sup>13</sup>C NMR (101 MHz, CDCl<sub>3</sub>) δ 171.12, 162.56, 162.31, 160.13, 150.68, 148.61, 142.31, 135.48, 132.41, 128.84, 128.27, 123.22, 114.96, 114.80, 84.41, 69.94, 66.98, 55.91, 55.58, 53.90, 47.95, 47.47, 38.91, 34.03, 30.66, 28.47 (one quaternary carbon was not observed). HRMS-ESI calculated for C<sub>35</sub>H<sub>46</sub>N<sub>5</sub>O<sub>8</sub> [M+H]<sup>+</sup> 664.3341, found 664.3339.

***cis*-4-[6-(4-Methoxyphenyl)-1-[2-(morpholin-4-yl)ethyl]-2-oxo-1,2-dihydro-1,8-naphthyridine-3-amido]cyclohexyl 7-[(*tert*-butoxy)carbonyl]amino}heptanoate (25)**

A solution of **20** (50 mg, 99 μmol), 7-[(*tert*-butoxy)carbonyl]amino}heptanoic acid (48 mg, 0.20 mmol), TFFH (49 mg, 0.20 mmol), Et<sub>3</sub>N (137 μL, 0.99 mmol) and DMAP (1.2 mg, 9.9 μmol) in DCM (4 mL) was reacted as described in the procedure for **24**. The crude residue was purified by flash silica column chromatography (1:2 hexane/EA) to yield **25** (48 mg, 66 μmol, 66%) as a yellow brown oil. <sup>1</sup>H NMR (400 MHz, CDCl<sub>3</sub>) δ 9.85 (d, *J* = 7.8 Hz, 1H, NH), 8.97 – 8.88 (m, 2H, ArH), 8.17 (d, *J* = 2.4 Hz, 1H, ArH), 7.60 – 7.52 (m, 2H, ArH MeOPh), 7.09 – 7.01 (m, 2H, ArH MeOPh), 4.98 (s, 1H, NH), 4.80 (t, *J* = 7.1 Hz, 2H, N1-CH<sub>2</sub>), 4.68 – 4.49 (m, 1H, CH), 4.17 – 4.05 (m, 1H, CH), 3.88 (s, 3H, O-CH<sub>3</sub>), 3.69 (t, *J* = 4.6 Hz, 4H, N-CH<sub>2</sub> morpholino), 3.11 (q, *J* = 6.7 Hz, 2H, CH<sub>2</sub>), 2.76 (t, *J* = 7.1 Hz, 2H, N1-CH<sub>2</sub>CH<sub>2</sub>), 2.70 – 2.52 (m, 4H, O-CH<sub>2</sub> morpholino), 2.33 (t, *J* = 7.5 Hz, 2H, CH<sub>2</sub>), 1.93 – 1.60 (m, 10H, CH<sub>2</sub>), 1.51 – 1.32 (m, 15H, CH<sub>2</sub> and *t*Bu CH<sub>3</sub>). <sup>13</sup>C NMR (101 MHz, CDCl<sub>3</sub>) δ 173.28, 162.66, 162.18, 160.14, 156.12, 150.67, 148.66, 142.30, 135.45, 132.41, 128.85, 128.27, 123.29, 114.97, 114.81, 69.19, 67.13, 56.06, 55.59, 54.06, 47.05, 40.68, 39.16, 34.74, 30.11, 29.84, 28.98, 28.66, 28.58, 27.84, 26.63, 25.14. HRMS-ESI calculated for C<sub>40</sub>H<sub>56</sub>N<sub>5</sub>O<sub>8</sub> [M+H]<sup>+</sup> 734.4123, found *m/z* 734.4144.

***trans*-4-[6-(4-Methoxyphenyl)-1-[2-(morpholin-4-yl)ethyl]-2-oxo-1,2-dihydro-1,8-naphthyridine-3-amido]cyclohexyl 7-[(*tert*-butoxy)carbonyl]amino}heptanoate (26)**

A solution of **21** (28 mg, 55 μmol), 7-[(*tert*-butoxy)carbonyl]amino}heptanoic acid (27 mg, 0.11 mmol), TFFH (27 mg, 0.11 mmol), Et<sub>3</sub>N (77 μL, 0.55 mmol) and DMAP (0.7 mg, 5.5 μmol) in DCM (1 mL) was reacted as described in the procedure for **24**. The crude residue was purified by flash silica column chromatography (100% EA) to yield **26** (32 mg, 44 μmol, 80%) as a yellow brown oil. <sup>1</sup>H NMR (400 MHz, CDCl<sub>3</sub>) δ 9.77 (d, *J* = 7.9 Hz, 1H, NH),

8.93 – 8.86 (m, 2H, ArH), 8.17 (d,  $J = 2.4$  Hz, 1H, ArH), 7.61 – 7.50 (m, 2H, ArH MeOPh), 7.08 – 7.00 (m, 2H, ArH MeOPh), 4.84 – 4.71 (m, 3H, NH and N1-CH<sub>2</sub>), 4.58 – 4.46 (m, 1H, CH), 4.12 – 3.97 (m, 1H, CH), 3.88 (s, 3H, O-CH<sub>3</sub>), 3.69 (t,  $J = 4.6$  Hz, 4H, N-CH<sub>2</sub> morpholino), 3.11 (q,  $J = 6.7$  Hz, 2H, CH<sub>2</sub>), 2.74 (t,  $J = 7.2$  Hz, 2H, N1-CH<sub>2</sub>CH<sub>2</sub>), 2.69 – 2.58 (m, 4H, O-CH<sub>2</sub> morpholino), 2.29 (t,  $J = 7.5$  Hz, 2H, CH<sub>2</sub>), 2.20 – 1.96 (m, 4H, CH<sub>2</sub>), 1.66 – 1.47 (m, 8H, CH<sub>2</sub>), 1.44 (s, 9H, *t*Bu CH<sub>3</sub>), 1.37 – 1.30 (m, 4H, CH<sub>2</sub>). <sup>13</sup>C NMR (101 MHz, CDCl<sub>3</sub>)  $\delta$  173.38, 162.58, 162.37, 160.14, 156.11, 150.69, 148.69, 142.26, 135.46, 132.39, 128.87, 128.28, 123.22, 114.97, 114.78, 71.78, 67.16, 56.05, 55.59, 54.07, 47.63, 40.66, 39.15, 34.67, 30.27, 30.07, 30.04, 28.92, 28.59, 26.60, 25.07 (one quaternary carbon was not observed). HRMS-ESI calculated for C<sub>40</sub>H<sub>55</sub>N<sub>5</sub>O<sub>8</sub> [M+H]<sup>+</sup> 734.4123, found  $m/z$  734.4072.

***tert*-Butyl *N*-({[(1*s*,4*s*)-4-[6-(4-methoxyphenyl)-1-[2-(morpholin-4-yl)ethyl]-2-oxo-1,2-dihydro-1,8-naphthyridine-3-amido]cyclohexyl]carbamoyl}methyl)carbamate (**27**)**

A solution of **22** (43 mg, 71.3  $\mu$ mol) and TFA (0.3 mL) in DCM (3 mL) was reacted as described in the procedure for **12**, to yield the TFA salt of 6-(4-methoxyphenyl)-1-[2-(morpholin-4-yl)ethyl]-2-oxo-*N*-[(1*s*,4*s*)-4-aminocyclohexyl]-1,2-dihydro-1,8-naphthyridine-3-carboxamide (60 mg) as a yellow solid. HRMS calculated for C<sub>28</sub>H<sub>36</sub>N<sub>5</sub>O<sub>4</sub> [M+H]<sup>+</sup> 506.2762, found  $m/z$  506.2767. This TFA salt (55 mg, 65.3  $\mu$ mol), DIPEA (68  $\mu$ L, 0.39 mmol), HATU (25 mg, 65.3  $\mu$ mol) and Boc-glycine (34 mg, 0.20 mmol) in DMF (2 mL) were used as described in the procedure for **10**. The reaction mixture was evaporated under reduced pressure and the residue taken up in EA (5 mL), washed with H<sub>2</sub>O (3 x 5 mL), sat. aq. NaCl (3 mL) and sat. NaHCO<sub>3</sub> (1 mL), dried over MgSO<sub>4</sub>, filtered and evaporated under reduced pressure. The crude product was purified by flash silica gel column chromatography (95:5 EA/MeOH) to yield **27** (13.4 mg, 20.3  $\mu$ mol, 31%) as a yellow solid ( $R_f$  0.10, 100% EA). <sup>1</sup>H NMR (400 MHz, CDCl<sub>3</sub>)  $\delta$  10.01 (d,  $J = 7.5$  Hz, 1H, NH), 8.94 – 8.87 (m, 2H, ArH), 8.17 (d,  $J = 2.4$  Hz, 1H, ArH), 7.59 – 7.51 (m, 2H, ArH MeOPh), 7.08 – 7.01 (m, 2H, ArH MeOPh), 6.24 (d,  $J = 7.7$  Hz, 1H, NH), 5.31 – 5.16 (m, 1H, NH), 4.79 (t,  $J = 6.8$  Hz, 2H, N1-CH<sub>2</sub>), 4.29 – 4.16 (m, 1H, CH), 4.03 – 3.90 (m, 1H, CH), 3.88 (s, 3H, O-CH<sub>3</sub>), 3.78 (d,  $J = 5.8$  Hz, 2H, COCH<sub>2</sub>NH), 3.69 (t,  $J = 4.6$  Hz, 4H, N-CH<sub>2</sub> morpholino), 2.82 – 2.72 (m, 2H, N1-CH<sub>2</sub>CH<sub>2</sub>), 2.71 – 2.57 (m, 4H, O-CH<sub>2</sub> morpholino), 1.90 – 1.75 (m, 6H, CH<sub>2</sub>), 1.68 – 1.56 (m, 2H, CH<sub>2</sub>), 1.47 (s, 9H, *t*Bu CH<sub>3</sub>). <sup>13</sup>C NMR (101 MHz, CDCl<sub>3</sub>)  $\delta$  168.81, 162.67, 162.22, 160.14, 156.30, 150.68, 148.65, 142.23, 135.46, 132.42, 128.82, 128.27, 123.24, 114.97,

114.80, 80.47, 67.14, 56.05, 55.58, 53.98, 46.50, 45.56, 44.85, 39.07, 29.83, 28.65, 28.49.  
HRMS calculated for  $C_{35}H_{47}N_6O_7$   $[M+H]^+$  663.3501, found  $m/z$  663.3508.

***cis*-4-[6-(4-Methoxyphenyl)-1-[2-(morpholin-4-yl)ethyl]-2-oxo-1,2-dihydro-1,8-naphthyridine-3-amido]cyclohexyl 2-acetamidoacetate (28)**

A solution of **23** (7.0 mg, 10.4  $\mu$ mol) and TFA (0.2 mL) in DCM (0.8 mL) was reacted as described in the procedure for **12**. The crude residue was purified by semi-preparative RP-HPLC to yield the TFA salt of *cis*-4-[6-(4-methoxyphenyl)-1-[2-(morpholin-4-yl)ethyl]-2-oxo-1,2-dihydro-1,8-naphthyridine-3-amido]cyclohexyl 2-aminoacetate (4.3 mg, 4.75  $\mu$ mol, 45%) as a yellow solid. Analytical RP-HPLC  $R_t$  = 12.83 min. This TFA salt (1.5 mg, 1.7  $\mu$ mol), DIPEA (0.87  $\mu$ L, 5.0  $\mu$ mol), and acetic anhydride (0.17  $\mu$ L, 1.8  $\mu$ mol) in DCM (503  $\mu$ L) were treated as in the procedure for **14**. The product was purified by semi-preparative RP-HPLC and passed through an Amberlyst A21 ion exchange resin to remove TFA, yielding **28** (0.97 mg, 1.6  $\mu$ mol, 96%) as a yellow solid. HRMS-ESI calculated for  $C_{32}H_{40}N_5O_7$   $[M+H]^+$  606.2922, found  $m/z$  606.2933. Analytical RP-HPLC  $R_t$  = 14.73 min.

***trans*-4-[6-(4-Methoxyphenyl)-1-[2-(morpholin-4-yl)ethyl]-2-oxo-1,2-dihydro-1,8-naphthyridine-3-amido]cyclohexyl 2-acetamidoacetate (29)**

A solution of **24** (4.1 mg, 6.2  $\mu$ mol) and TFA (0.2 mL) in DCM (0.8 mL) was reacted as described in the procedure for **12**. The crude was purified by semi-preparative RP-HPLC to yield the TFA salt of *trans*-4-[6-(4-methoxyphenyl)-1-[2-(morpholin-4-yl)ethyl]-2-oxo-1,2-dihydro-1,8-naphthyridine-3-amido]cyclohexyl 2-aminoacetate (3.1 mg, 3.42  $\mu$ mol, 55%) as a yellow solid. Analytical RP-HPLC  $R_t$  = 12.83 min. This TFA salt of (1.4 mg, 1.5  $\mu$ mol), DIPEA (0.81  $\mu$ L, 4.6  $\mu$ mol), and acetic anhydride (0.16  $\mu$ L, 1.7  $\mu$ mol) in DCM (496  $\mu$ L) were treated as in the procedure for **14**. The product was purified by semi-preparative RP-HPLC and passed through an Amberlyst A21 ion exchange resin to remove TFA, yielding **29** (0.9 mg, 1.49  $\mu$ mol, 96%) as a yellow solid. Low resolution MS-ESI calculated for  $C_{32}H_{40}N_5O_7$   $[M+H]^+$  606.2922, found 606.2. Analytical RP-HPLC  $R_t$  = 14.70 min.

***cis*-4-[6-(4-Methoxyphenyl)-1-[2-(morpholin-4-yl)ethyl]-2-oxo-1,2-dihydro-1,8-naphthyridine-3-amido]cyclohexyl 7-acetamidoheptanoate (30)**

A solution of **25** (22 mg, 29.6  $\mu$ mol) and TFA (0.25 mL) in DCM (1 mL) was reacted as described in the procedure for **12**. The crude was purified by semi-preparative RP-HPLC to

yield the TFA salt of *cis*-4-[6-(4-methoxyphenyl)-1-[2-(morpholin-4-yl)ethyl]-2-oxo-1,2-dihydro-1,8-naphthyridine-3-amido]cyclohexyl 7-aminoheptanoate (13 mg, 13.3  $\mu$ mol, 45%) as a yellow solid. HRMS-ESI calculated for  $C_{35}H_{48}N_5O_6$   $[M+H]^+$  634.3599, found  $m/z$  634.3595. Analytical RP-HPLC  $R_t$  = 14.41 min. This TFA salt (3.3 mg, 3.4  $\mu$ mol), DIPEA (1.77  $\mu$ L, 10.2  $\mu$ mol), and acetic anhydride (0.35  $\mu$ L, 3.7  $\mu$ mol) in DCM (610  $\mu$ L) were treated as in the procedure for **14**. The product was purified by semi-preparative RP-HPLC and passed through an Amberlyst A21 ion exchange resin to remove TFA, yielding **30** (2.23 mg, 3.3  $\mu$ mol, 98%) as a yellow solid. HRMS-ESI calculated for  $C_{37}H_{50}N_5O_7$   $[M+H]^+$  676.3705, found  $m/z$  676.3710. Analytical RP-HPLC  $R_t$  = 16.76 min.

***trans*-4-[6-(4-Methoxyphenyl)-1-[2-(morpholin-4-yl)ethyl]-2-oxo-1,2-dihydro-1,8-naphthyridine-3-amido]cyclohexyl 7-acetamidoheptanoate (31)**

A solution of **26** (15 mg, 20.8  $\mu$ mol) and TFA (0.25 mL) in DCM (1 mL) was reacted as described in the procedure for **12**. The crude was purified by semi-preparative RP-HPLC to yield the TFA salt of *trans*-4-[6-(4-methoxyphenyl)-1-[2-(morpholin-4-yl)ethyl]-2-oxo-1,2-dihydro-1,8-naphthyridine-3-amido]cyclohexyl 7-aminoheptanoate (11.1 mg, 11.4  $\mu$ mol, 55%) as a yellow solid. HRMS-ESI calculated for  $C_{35}H_{48}N_5O_6$   $[M+H]^+$  634.3599, found  $m/z$  634.3583. Analytical RP-HPLC  $R_t$  = 14.42 min. This TFA salt (3.5 mg, 3.6  $\mu$ mol), DIPEA (1.87  $\mu$ L, 10.8  $\mu$ mol), and acetic anhydride (0.7  $\mu$ L, 4.0  $\mu$ mol) in DCM (622  $\mu$ L) were treated as in the procedure for **14**. The product was purified by semi-preparative RP-HPLC and passed through an Amberlyst A21 ion exchange resin to remove TFA, yielding **31** (2.36 mg, 3.5  $\mu$ mol, 97%) as a yellow solid. HRMS-ESI calculated for  $C_{37}H_{50}N_5O_7$   $[M+H]^+$  676.3705, found  $m/z$  676.3737. Analytical RP-HPLC  $R_t$  = 16.81 min.

Compound **32** detailed in manuscript.

***trans*-4-[6-(4-Methoxyphenyl)-1-[2-(morpholin-4-yl)ethyl]-2-oxo-1,2-dihydro-1,8-naphthyridine-3-amido]cyclohexyl 2-[6-(2-{4-[(E)-2-[2,2-difluoro-4-(thiophen-2-yl)-1 $\lambda$ 4,3-diaza-2 $\lambda$ 4-boratricyclo[7.3.0.0<sup>3</sup>,7]dodeca-1(12),4,6,8,10-pentaen-12-yl]ethenyl]phenoxy}acetamido)hexanamido]acetate (33)**

The TFA salt of *trans*-4-[6-(4-methoxyphenyl)-1-[2-(morpholin-4-yl)ethyl]-2-oxo-1,2-dihydro-1,8-naphthyridine-3-amido]cyclohexyl 2-aminoacetate (1.7 mg, 1.9  $\mu$ mol), DIPEA (1.3  $\mu$ L, 7.6  $\mu$ mol), BODIPY 630/650-X-OSu (1.25 mg, 1.89  $\mu$ mol) and DMF (721  $\mu$ L) were

reacted as described in the procedure for **16**. The crude product was purified by semi-preparative RP-HPLC and passed through an Amberlyst A21 ion exchange resin to remove TFA, yielding **33** (1.51 mg, 1.36  $\mu$ mol, 72%) as a bright blue solid. HRMS-ESI calculated for  $C_{59}H_{64}BF_2N_8O_9S$   $[M+H]^+$  1109.4582, found  $m/z$  1109.4580. Analytical RP-HPLC  $R_t$  = 20.39 min.

***cis*-4-[6-(4-Methoxyphenyl)-1-[2-(morpholin-4-yl)ethyl]-2-oxo-1,2-dihydro-1,8-naphthyridine-3-amido]cyclohexyl 7-[6-(2-{4-[(E)-2-[2,2-difluoro-4-(thiophen-2-yl)-1 $\lambda$ 4,3-diaza-2 $\lambda$ 4-boratricyclo[7.3.0.0<sup>3,7</sup>]dodeca-1(12),4,6,8,10-pentaen-12-yl]ethenyl]phenoxy}acetamido)hexanamido]heptanoate (**34**)**

A solution of **26** (15 mg, 20.8  $\mu$ mol) and TFA (0.25 mL) in DCM (1 mL) was reacted as described in the procedure for **12**. The crude was purified by semi-preparative RP-HPLC to yield the TFA salt of *trans*-4-[6-(4-methoxyphenyl)-1-[2-(morpholin-4-yl)ethyl]-2-oxo-1,2-dihydro-1,8-naphthyridine-3-amido]cyclohexyl 7-aminoheptanoate (11.1 mg, 11.4  $\mu$ mol, 55%) as a yellow solid. HRMS-ESI calculated for  $C_{35}H_{48}N_5O_6$   $[M+H]^+$  634.3599, found  $m/z$  634.3583. Analytical RP-HPLC  $R_t$  = 14.42 min. This TFA salt (3.7 mg, 3.8  $\mu$ mol), DIPEA (2.0  $\mu$ L, 11.4  $\mu$ mol), BODIPY 630/650-X-OSu (1.25 mg, 1.89  $\mu$ mol) and DMF (732  $\mu$ L) were reacted as described in the procedure for **16**. The crude product was purified by semi-preparative RP-HPLC and passed through an Amberlyst A21 ion exchange resin to remove TFA, yielding **34** (1.74 mg, 1.48  $\mu$ mol, 78%) as a bright blue solid. HRMS-ESI calculated for  $C_{64}H_{74}BF_2N_8O_9S$   $[M+H]^+$  1179.5366, found  $m/z$  1179.5276. Analytical RP-HPLC  $R_t$  = 21.39 min.

***trans*-4-[6-(4-Methoxyphenyl)-1-[2-(morpholin-4-yl)ethyl]-2-oxo-1,2-dihydro-1,8-naphthyridine-3-amido]cyclohexyl 7-[6-(2-{4-[(E)-2-[2,2-difluoro-4-(thiophen-2-yl)-1 $\lambda$ 4,3-diaza-2 $\lambda$ 4-boratricyclo[7.3.0.0<sup>3,7</sup>]dodeca-1(12),4,6,8,10-pentaen-12-yl]ethenyl]phenoxy}acetamido)hexanamido]heptanoate (**35**)**

The TFA salt of *trans*-4-[6-(4-methoxyphenyl)-1-[2-(morpholin-4-yl)ethyl]-2-oxo-1,2-dihydro-1,8-naphthyridine-3-amido]cyclohexyl 7-aminoheptanoate (4.2 mg, 4.3  $\mu$ mol), DIPEA (2.2  $\mu$ L, 12.5  $\mu$ mol), BODIPY 630/650-X-OSu (1.25 mg, 1.89  $\mu$ mol) and DMF (735  $\mu$ L) were reacted as described in the procedure for **16**. The crude product was purified by semi-preparative RP-HPLC and passed through an Amberlyst A21 ion exchange resin to remove TFA, yielding **35** (2.16 mg, 1.83  $\mu$ mol, 97%) as a bright blue solid. HRMS-ESI

calculated for  $C_{64}H_{74}BF_2N_8O_9S$   $[M+H]^+$  1179.5366, found  $m/z$  1179.5275. Analytical RP-HPLC  $R_t$  = 21.43 min.

**6-(4-Methoxyphenyl)-1-[2-(morpholin-4-yl)ethyl]-2-oxo-*N*-[(1*s*,4*s*)-4-{2-[6-(2-{4-[(*E*)-2-[2,2-difluoro-4-(thiophen-2-yl)-1,4,3-diaza-2,4-boratricyclo[7.3.0.0<sup>3,7</sup>]dodeca-1(12),4,6,8,10-pentaen-12-yl]ethenyl]phenoxy}acetamido)hexanamido]-acetamido}cyclohexyl]-1,2-dihydro-1,8-naphthyridine-3-carboxamide (36)**

A solution of **27** (12 mg, 18.1  $\mu$ mol) and TFA (0.4 mL) in DCM (1.6 mL) was reacted as described in the procedure for **12**. The crude was purified by semi-preparative RP-HPLC to yield the TFA salt of 6-(4-methoxyphenyl)-1-[2-(morpholin-4-yl)ethyl]-2-oxo-*N*-[(1*s*,4*s*)-4-(2-aminoacetamido)cyclohexyl]-1,2-dihydro-1,8-naphthyridine-3-carboxamide (9.27 mg, 10.3  $\mu$ mol, 57%) as a yellow solid. HRMS calculated for  $C_{30}H_{39}N_6O_5$   $[M+H]^+$  563.2904, found  $m/z$  563.2943. Analytical RP-HPLC  $R_t$  = 12.47 min. This TFA salt (3.39 mg, 3.8  $\mu$ mol), DIPEA (1.85  $\mu$ L, 10.6  $\mu$ mol), BODIPY 630/650-X-OSu (1 mg, 1.51  $\mu$ mol) and DMF (731  $\mu$ L) were reacted as described in the procedure for **16**. The crude product was purified by semi-preparative RP-HPLC and passed through an Amberlyst A21 ion exchange resin to remove TFA, yielding **36** (2.29 mg, 2.07  $\mu$ mol, quantitative yield\*) as a bright blue solid. HRMS calculated for  $C_{59}H_{65}BF_2N_9O_8S$   $[M+H]^+$  1108.4742, found  $m/z$  1108.4777. Analytical RP-HPLC  $R_t$  = 20.12 min. \*The greater than 100% calculated yield for **36** (137%) was likely due to the commercially supplied container of BODIPY 630/650-X-OSu containing more than the stated 1 mg. Previous synthesis of dye compounds have used a larger container of BODIPY 630/650-X-OSu (e.g. 5 mg) split between three or four reactions, and therefore any excess in BODIPY 630/650-X-OSu would be spread across compounds.

### cAMP assays in wild-type cells *not* expressing hCB<sub>2</sub>

Linker-conjugate **30** and fluorescent ligand **32** invoked a small but significant response at 10  $\mu$ M but not at 1  $\mu$ M in the WT HEK-Flp line (control for CB<sub>2</sub> response; Supplementary Table 1). Fluorescent ligand **32** and smaller ligand **6** showed a significant response at 10  $\mu$ M in the HEK293 WT cells (control for CB<sub>1</sub> response), but not at 1  $\mu$ M. The potencies of **30** at CB<sub>2</sub> receptor and **32** at CB<sub>2</sub> and CB<sub>1</sub> receptor are too low to be able to exclude the 10  $\mu$ M data point from the concentration response curve, therefore the potencies are an estimate and the E<sub>max</sub> values will be slightly augmented by these non-specific effects. The response of **32** at 10  $\mu$ M in the HEK293 WT cells (parental CB<sub>1</sub> line; 166.6%  $\pm$  11.1) was slightly greater than the 10  $\mu$ M response in the HEK293-CB<sub>1</sub> cells (157%  $\pm$  2.1), therefore the E<sub>max</sub> of **32** at 1  $\mu$ M is reported for CB<sub>1</sub> receptor (Table 2). SR144528 was also screened for activity in WT cells and demonstrated no significant response in either cell line.

Supplementary Table 1: Forskolin stimulated cAMP response in wild type HEK293 cells.

| Compound  | % response $\pm$ SEM, HEK-Flp WT line (for comparison with hCB <sub>2</sub> cAMP response) |                 | % response $\pm$ SEM, HEK WT line (for comparison with hCB <sub>1</sub> cAMP response) |                 |
|-----------|--------------------------------------------------------------------------------------------|-----------------|----------------------------------------------------------------------------------------|-----------------|
|           | 10 $\mu$ M                                                                                 | 1 $\mu$ M       | 10 $\mu$ M                                                                             | 1 $\mu$ M       |
| <b>1</b>  | 109.5 $\pm$ 3.9                                                                            | 95.8 $\pm$ 4.7  | -                                                                                      | -               |
| <b>6</b>  | 100.6 $\pm$ 3.0                                                                            | 94.3 $\pm$ 2.2  | 121.5 $\pm$ 3.5 *                                                                      | 95.7 $\pm$ 3.6  |
| <b>8</b>  | 97.4 $\pm$ 3.3                                                                             | 96.4 $\pm$ 1.9  | 107.2 $\pm$ 2.8                                                                        | 97.9 $\pm$ 2.6  |
| <b>20</b> | 111.9 $\pm$ 5.4                                                                            | 95.3 $\pm$ 1.4  | -                                                                                      | -               |
| <b>28</b> | 109.8 $\pm$ 5.2                                                                            | 92.2 $\pm$ 1.1  | -                                                                                      | -               |
| <b>30</b> | 122.9 $\pm$ 6.2 *                                                                          | 98.3 $\pm$ 2.5  | -                                                                                      | -               |
| <b>32</b> | 139.5 $\pm$ 10.0 *                                                                         | 100.5 $\pm$ 2.5 | 166.6 $\pm$ 11.1 *                                                                     | 105.4 $\pm$ 2.9 |
| SR144528  | 97.4 $\pm$ 5.9                                                                             | 98.5 $\pm$ 3.8  | 94.5 $\pm$ 1.6                                                                         | 99.8 $\pm$ 2.2  |

cAMP levels measured in a BRET assay using a CAMYEL sensor. Data represent mean values  $\pm$  SEM for at least three independent experiments conducted in duplicate. Values are normalised to basal (0%) and forskolin (100%) response. Data was analysed for normality in a D'Agostino & Pearson normality test and then analysed using a one sample *t* test for significant difference to forskolin only (100%) response and values marked with \* demonstrated significant difference.

## References

- 1 V. Lucchesi, D. P. Hurst, D. M. Shore, S. Bertini, B. M. Ehrmann, M. Allarà, L. Lawrence, A. Ligresti, F. Minutolo, G. Saccomanni, H. Sharir, M. Macchia, V. Di Marzo, M. E. Abood, P. H. Reggio and C. Manera, *J. Med. Chem.*, 2014, **57**, 8777–8791.
- 2 M. L. Bolognesi, N. Calonghi, C. Mangano, L. Masotti and C. Melchiorre, *J. Med. Chem.*, 2008, **51**, 5463–5467.
- 3 H. Y. Song, M. H. Ngai, Z. Y. Song, P. A. Macary, J. Hobley and M. J. Lear, *Org. Biomol. Chem.*, 2009, **7**, 3400–3406.
